# Supplementary material for: Exploring micro-scale heterogeneity as a driver of biogeochemical transformations and gas transport in peat
Source: Copernicus journal article supplement (doi:10.5194/egusphere-2024-1280), 2024-05-14
Supplement: Supplementary file 1 [file egusphere-2024-1280-supplement.pdf]

# **Exploring micro-scale heterogeneity as a driver of biogeochemical transformations and gas transport in peat - Supporting Information**

Lukas Kohl<sup>1,2,3</sup>, Petri Kiuru<sup>4</sup>, Marjo Palviainen<sup>5</sup>, Maarit Raivonen<sup>1</sup>, Markku Koskinen<sup>2,6</sup>, Mari Pihlatie<sup>2,6</sup>, Annamari Laurén<sup>4,5</sup>

<sup>1</sup>Institute for Atmospheric and Earth System Research (INAR)/Physics, Faculty of Science, University of Helsinki, Helsinki, Finland

<sup>2</sup>University of Helsinki, Faculty of Agricultural Sciences, Department of Agricultural Sciences, Helsinki, Finland

<sup>3</sup>Department of Environmental and Biological Sciences, Faculty of Science, Forestry and Technology, University of Eastern Finland, Kuopio, Finland

<sup>4</sup>School of Forest Sciences, Faculty of Science, Forestry and Technology, University of Eastern Finland, Joensuu, Finland

<sup>5</sup>Department of Forest Sciences, University of Helsinki, Helsinki, Finland

<sup>6</sup>Institute for Atmospheric and Earth System Research (INAR)/Forest Sciences, Faculty of Agriculture and Forestry, University of Helsinki, Helsinki, Finland

*Correspondence to:* Lukas Kohl (lukas.kohl@uef.fi)

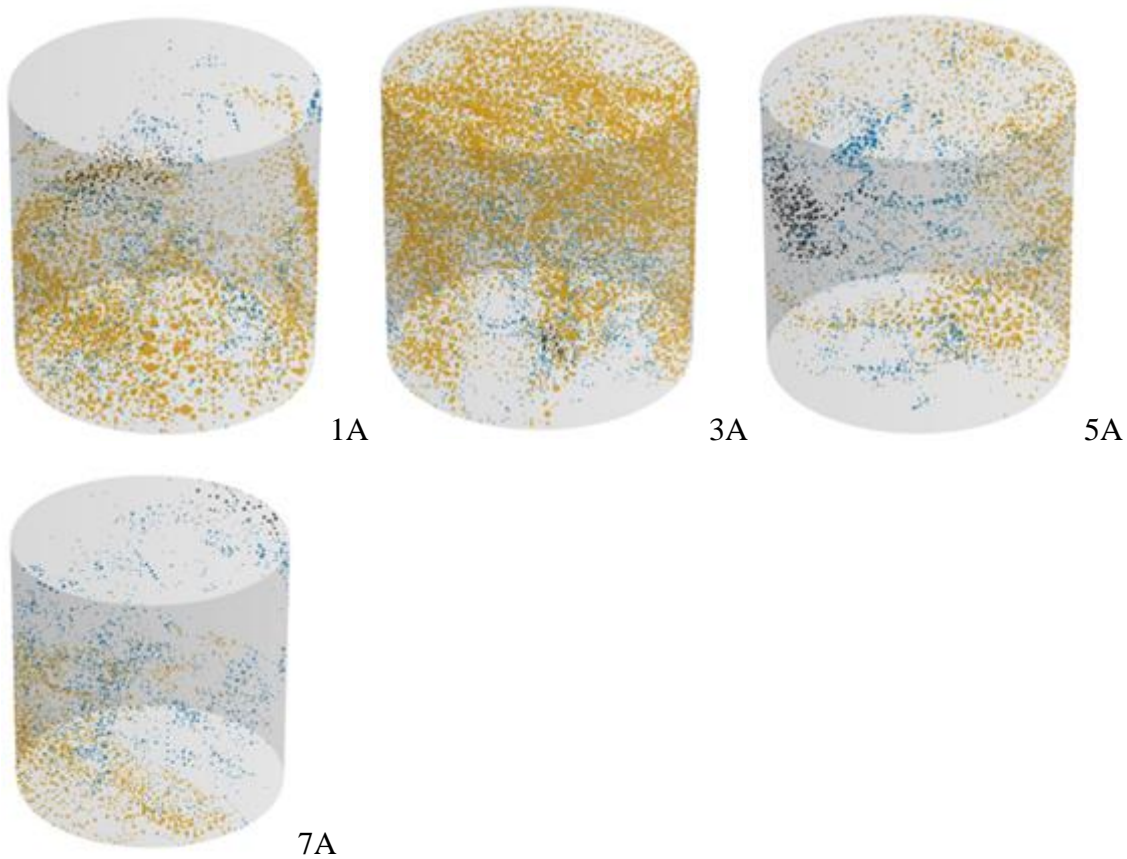

**Fig S1.** The pore system of the final image domain / network domain of the sample. Largest (= highest number of pores) connected pore cluster (= the pore network) in brown; second largest connected pore cluster in black; other pore clusters + individual pores in blue. [The illustration of the second largest cluster gives some indication of the connectivity of the blue pores. The marker sizes show the relative sizes of the pores (in comparison to each other); otherwise, the pore sizes are not to scale and the image is for illustrative purposes only.

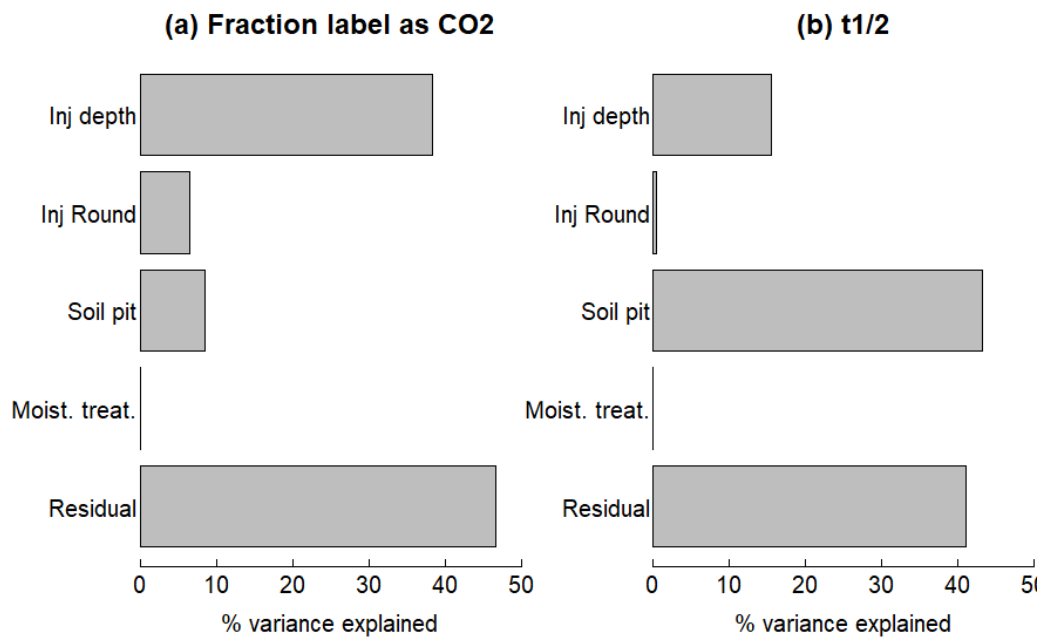

**Figure S2.** Fraction of variance of the fraction of label converted to CO<sub>2</sub> (a) and the time from injection to half of the label-derived emissions had occurred ( $t_{1/2}$ , b) explained by independent variables (injection depth, injection round, soil pit, moisture treatment, residual variance)

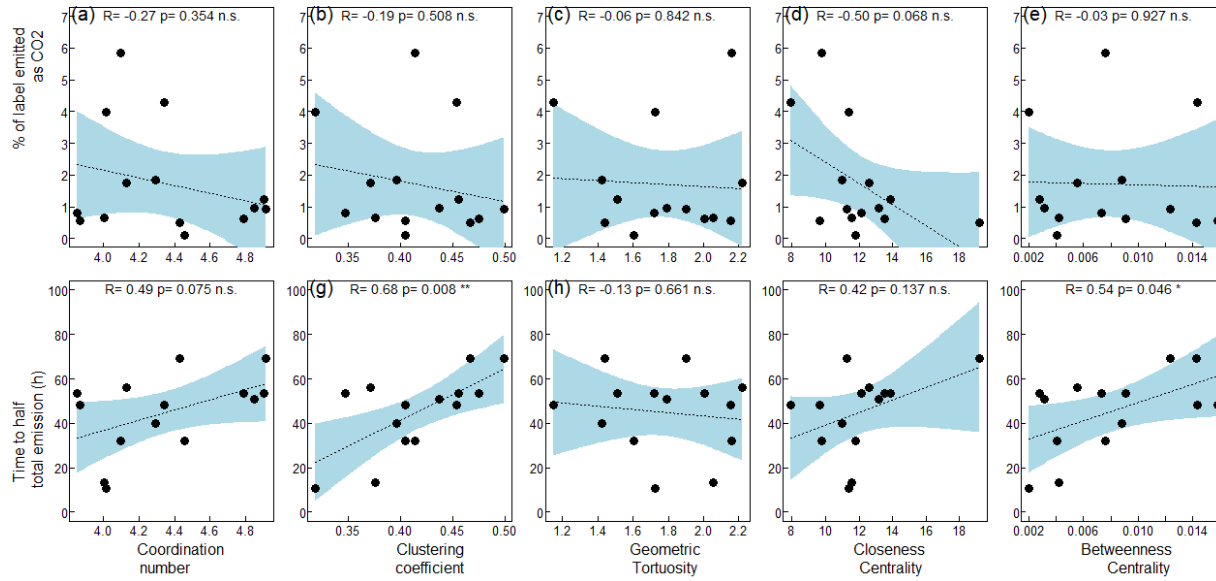

**Figure S3.** Correlation between network metrics and emission characteristics (fraction of label emitted as CO<sub>2</sub>, lag of CO<sub>2</sub> emission, time to half of total emission).

5 **Table S1.** Correlation coefficients between air filled porosity, network metrics, and

|                                                              | air-filled por.<br>0-5cm | air-filled por.<br>0-8cm | Coord.<br>numb. | Clust. coef. | Geom<br>tort. | Closen.<br>centr. | Betw. centr. | Label-der.<br>CO <sub>2</sub> 2cm | Label-der.<br>CO <sub>2</sub> 5cm | Label-der.<br>CO <sub>2</sub> 8cm | t1/2 2cm | t1/2 5cm | t1/2 8cm |
|--------------------------------------------------------------|--------------------------|--------------------------|-----------------|--------------|---------------|-------------------|--------------|-----------------------------------|-----------------------------------|-----------------------------------|----------|----------|----------|
| air-filled porosity 0-2cm                                    | 0.90                     | 0.73                     | 0.14            | -0.31        | 0.15          | 0.01              | -0.70        | -0.09                             | 0.49                              | 0.43                              | -0.79    | -0.71    | -0.33    |
| air-filled porosity 0-5cm                                    |                          | 0.88                     | 0.23            | -0.27        | -0.08         | 0.05              | -0.78        | -0.15                             | 0.29                              | 0.27                              | -0.73    | -0.83    | -0.36    |
| air-filled porosity 0-8cm                                    |                          |                          | -0.01           | -0.49        | 0.03          | -0.01             | -0.88        | -0.34                             | -0.06                             | 0.15                              | -0.47    | -0.75    | -0.65    |
| Coordination number                                          |                          |                          |                 | 0.80         | -0.26         | 0.33              | -0.08        | -0.18                             | 0.41                              | -0.28                             | -0.29    | -0.24    | 0.48     |
| Clustering coefficient                                       |                          |                          |                 |              | -0.21         | 0.24              | 0.48         | 0.13                              | 0.36                              | -0.23                             | -0.02    | 0.18     | 0.66     |
| Geometric tortuosity                                         |                          |                          |                 |              |               | -0.11             | -0.13        | -0.04                             | 0.09                              | -0.06                             | -0.08    | 0.16     | -0.13    |
| Closeness centrality                                         |                          |                          |                 |              |               |                   | -0.07        | -0.23                             | 0.19                              | -0.49                             | 0.07     | -0.22    | 0.38     |
| Betweenness centrality                                       |                          |                          |                 |              |               |                   |              | 0.62                              | 0.01                              | -0.06                             | 0.41     | 0.71     | 0.56     |
| Label-derived CO <sub>2</sub> emitted<br>after 2cm injection |                          |                          |                 |              |               |                   |              |                                   | 0.34                              | 0.28                              | -0.22    | 0.21     | 0.43     |
| Label-derived CO <sub>2</sub> emitted<br>after 5cm injection |                          |                          |                 |              |               |                   |              |                                   |                                   | 0.46                              | -0.58    | -0.35    | 0.32     |
| Label-derived CO <sub>2</sub> emitted<br>after 8cm injection |                          |                          |                 |              |               |                   |              |                                   |                                   |                                   | -0.42    | -0.22    | -0.38    |
| t1/2 after 2cm injection                                     |                          |                          |                 |              |               |                   |              |                                   |                                   |                                   |          | 0.71     | -0.06    |
| t1/2 after 5cm injection                                     |                          |                          |                 |              |               |                   |              |                                   |                                   |                                   |          |          | 0.26     |
